# Supplementary material for: Isolation and Characterization of Enterococcus faecium from Fermented Korean Soybean Paste with Antibacterial Effects
Source: MDPI journal article supplement (doi:10.3390/fermentation9080760), 2023-08-14
Supplement: s1 [file s1]

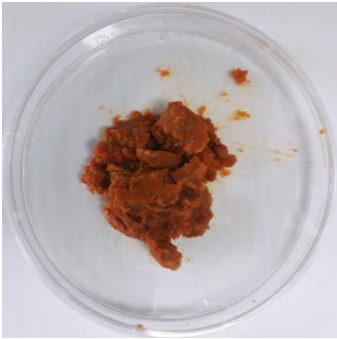

**Fermented soybean  
paste (2 year)**

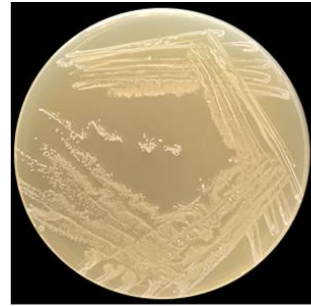

**So001**

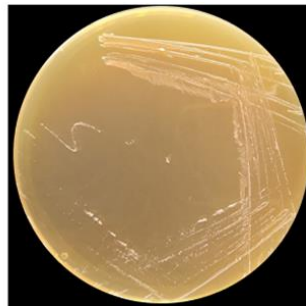

**So002**

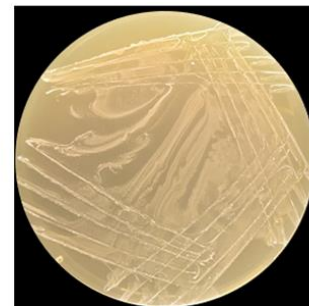

**So003**

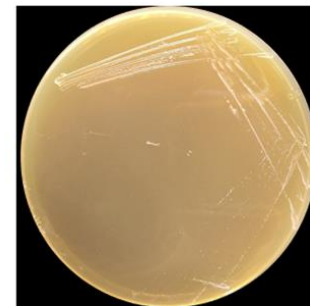

**So004**

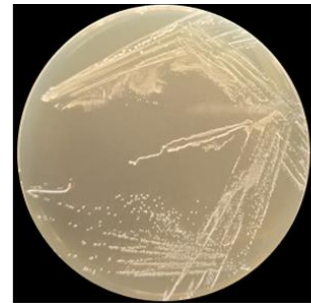

**So005**

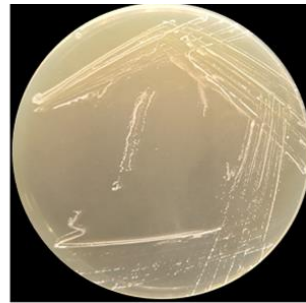

**So008**

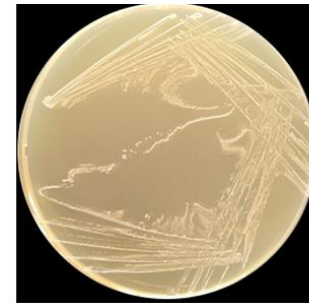

**So009**

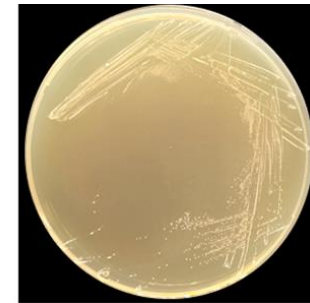

**So010**

**Figure S1.** The plate image of isolated of probiotics from Korean fermented soybean paste.

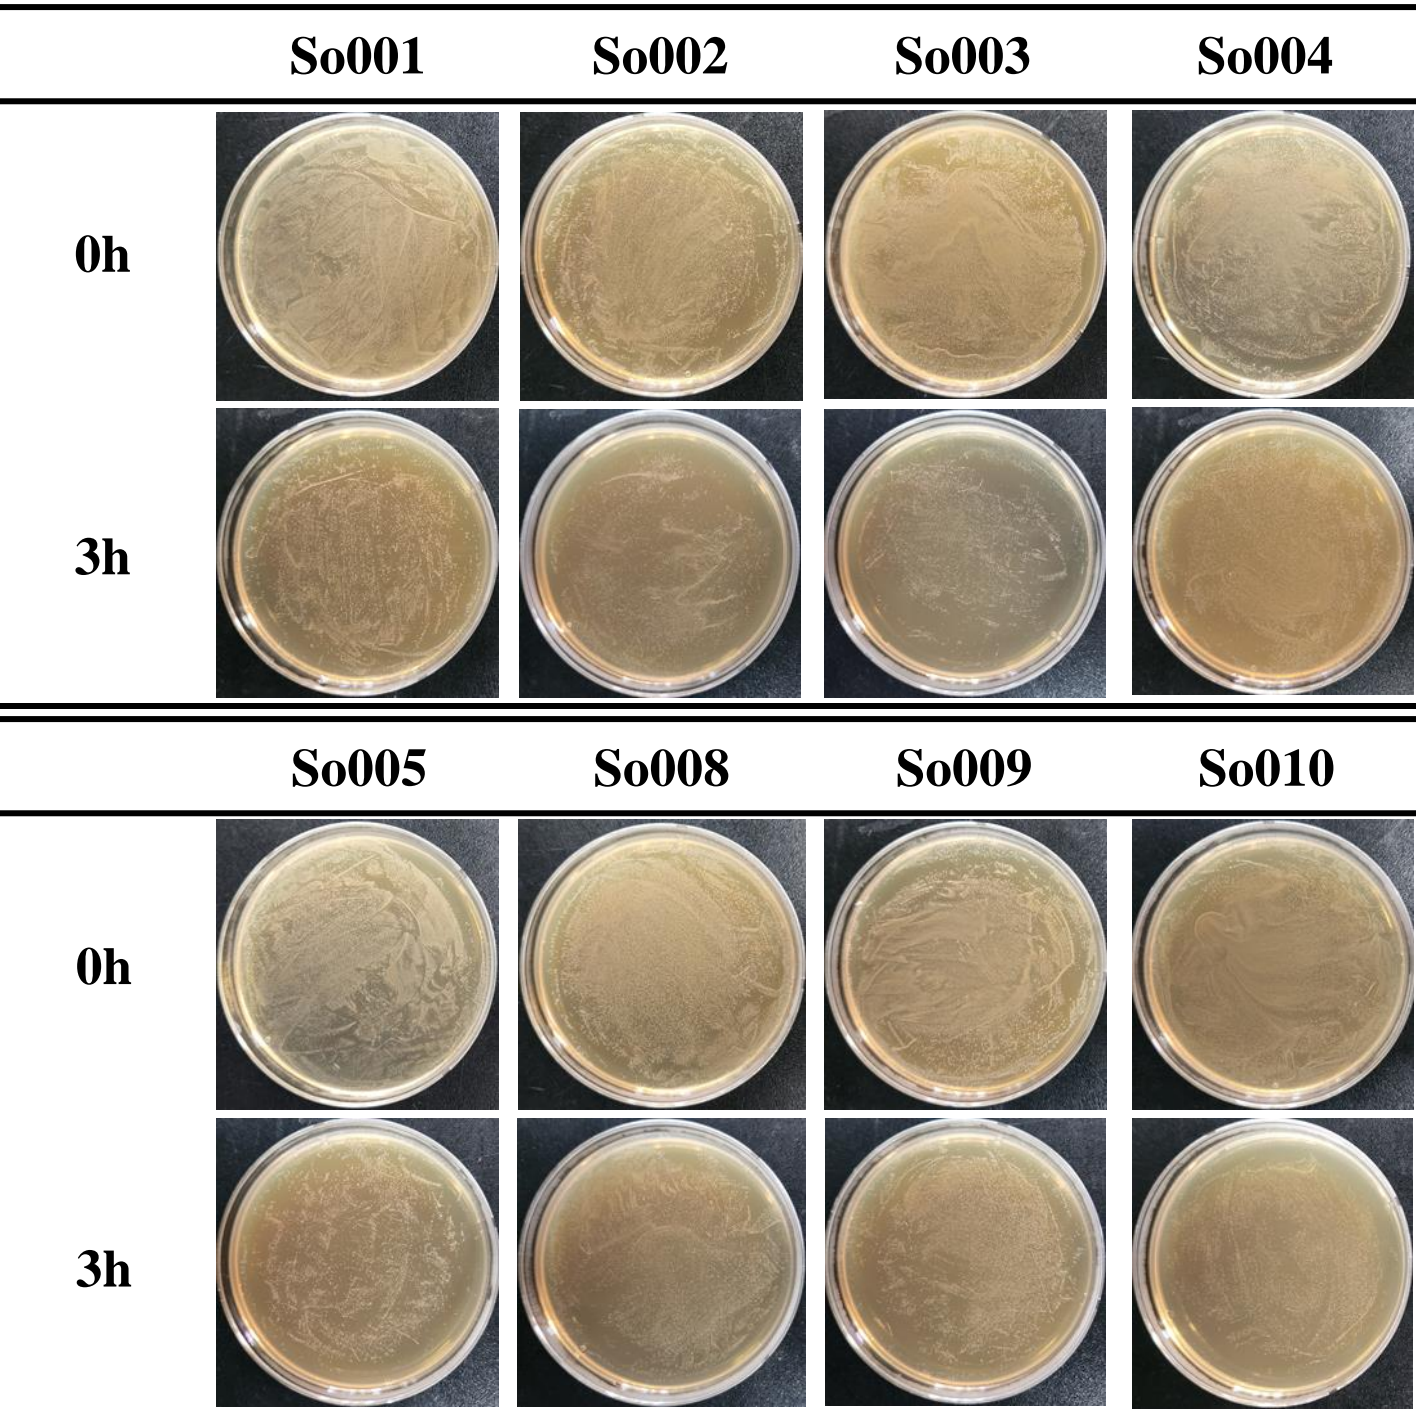

**Figure S2.** The plate picture of isolates before and after exposed to low pH environment.



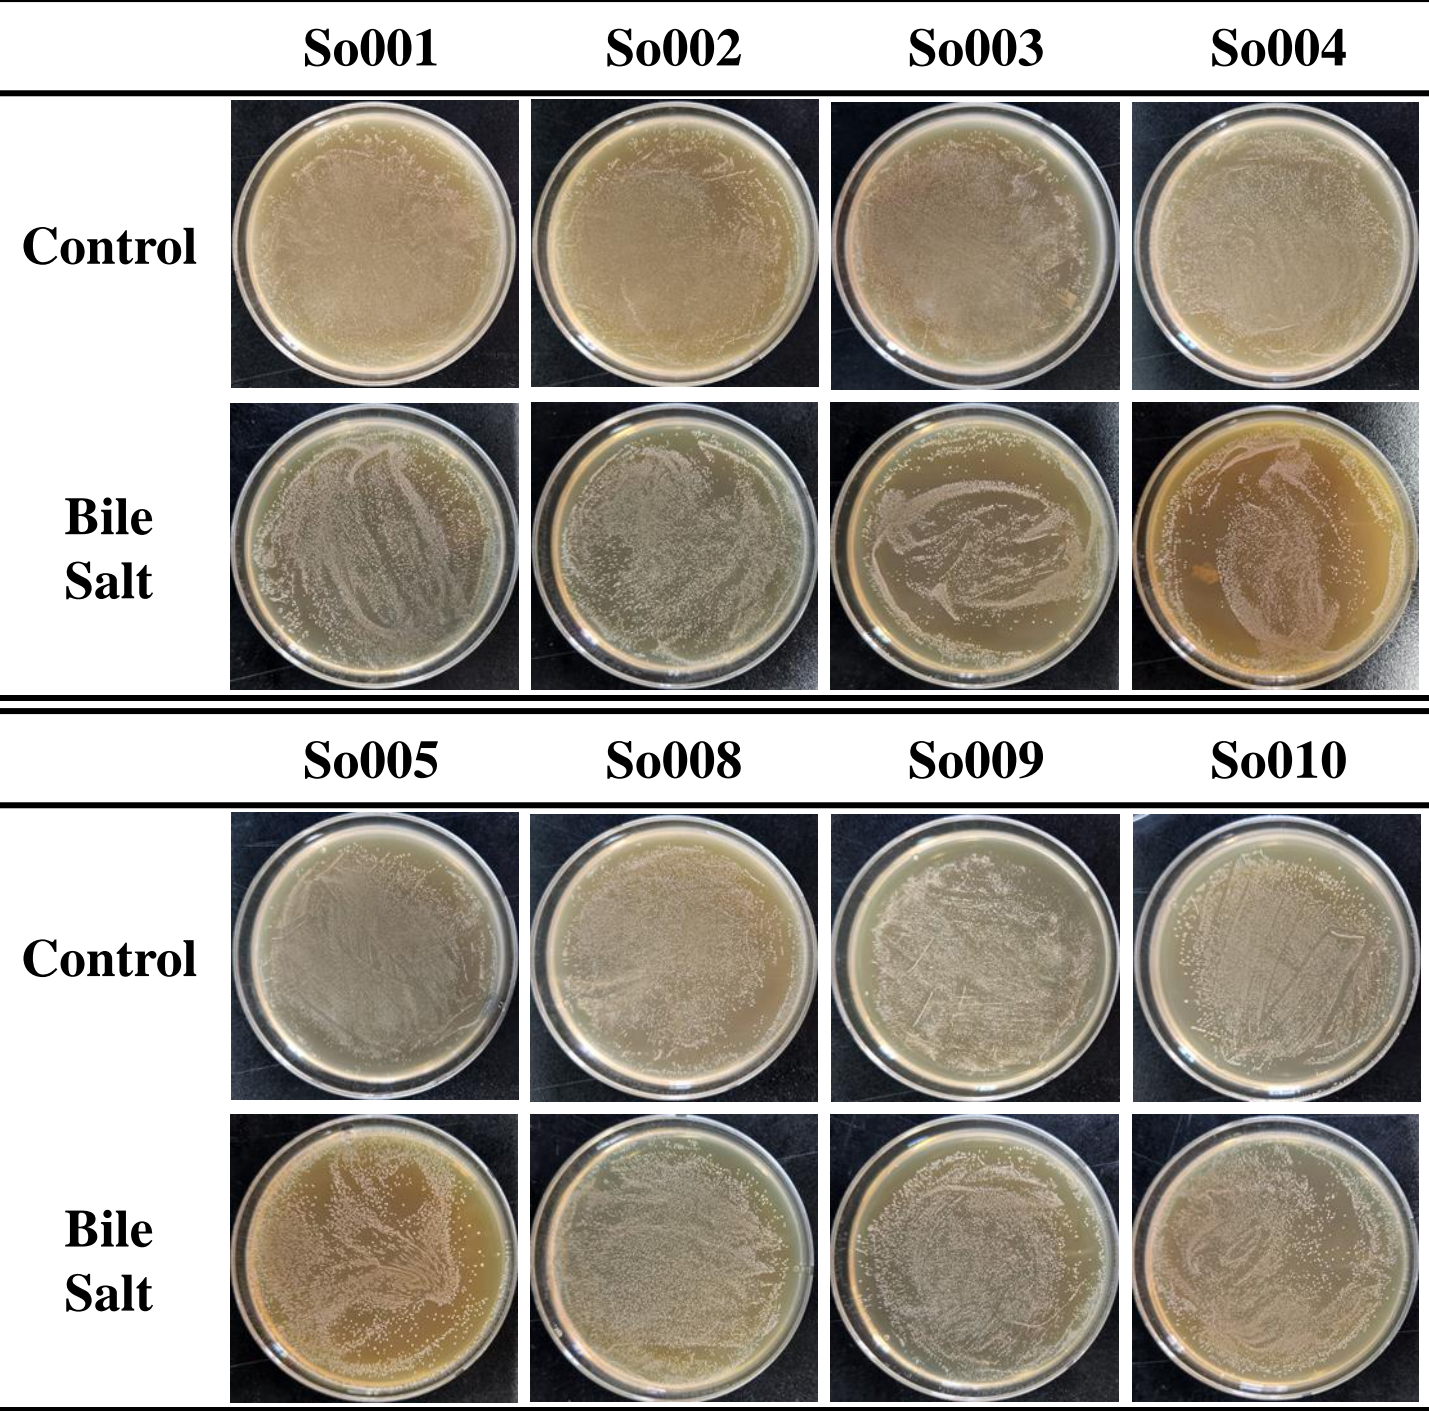

**Figure S3.** The plate picture of isolates before and after exposed to bile salt environment.



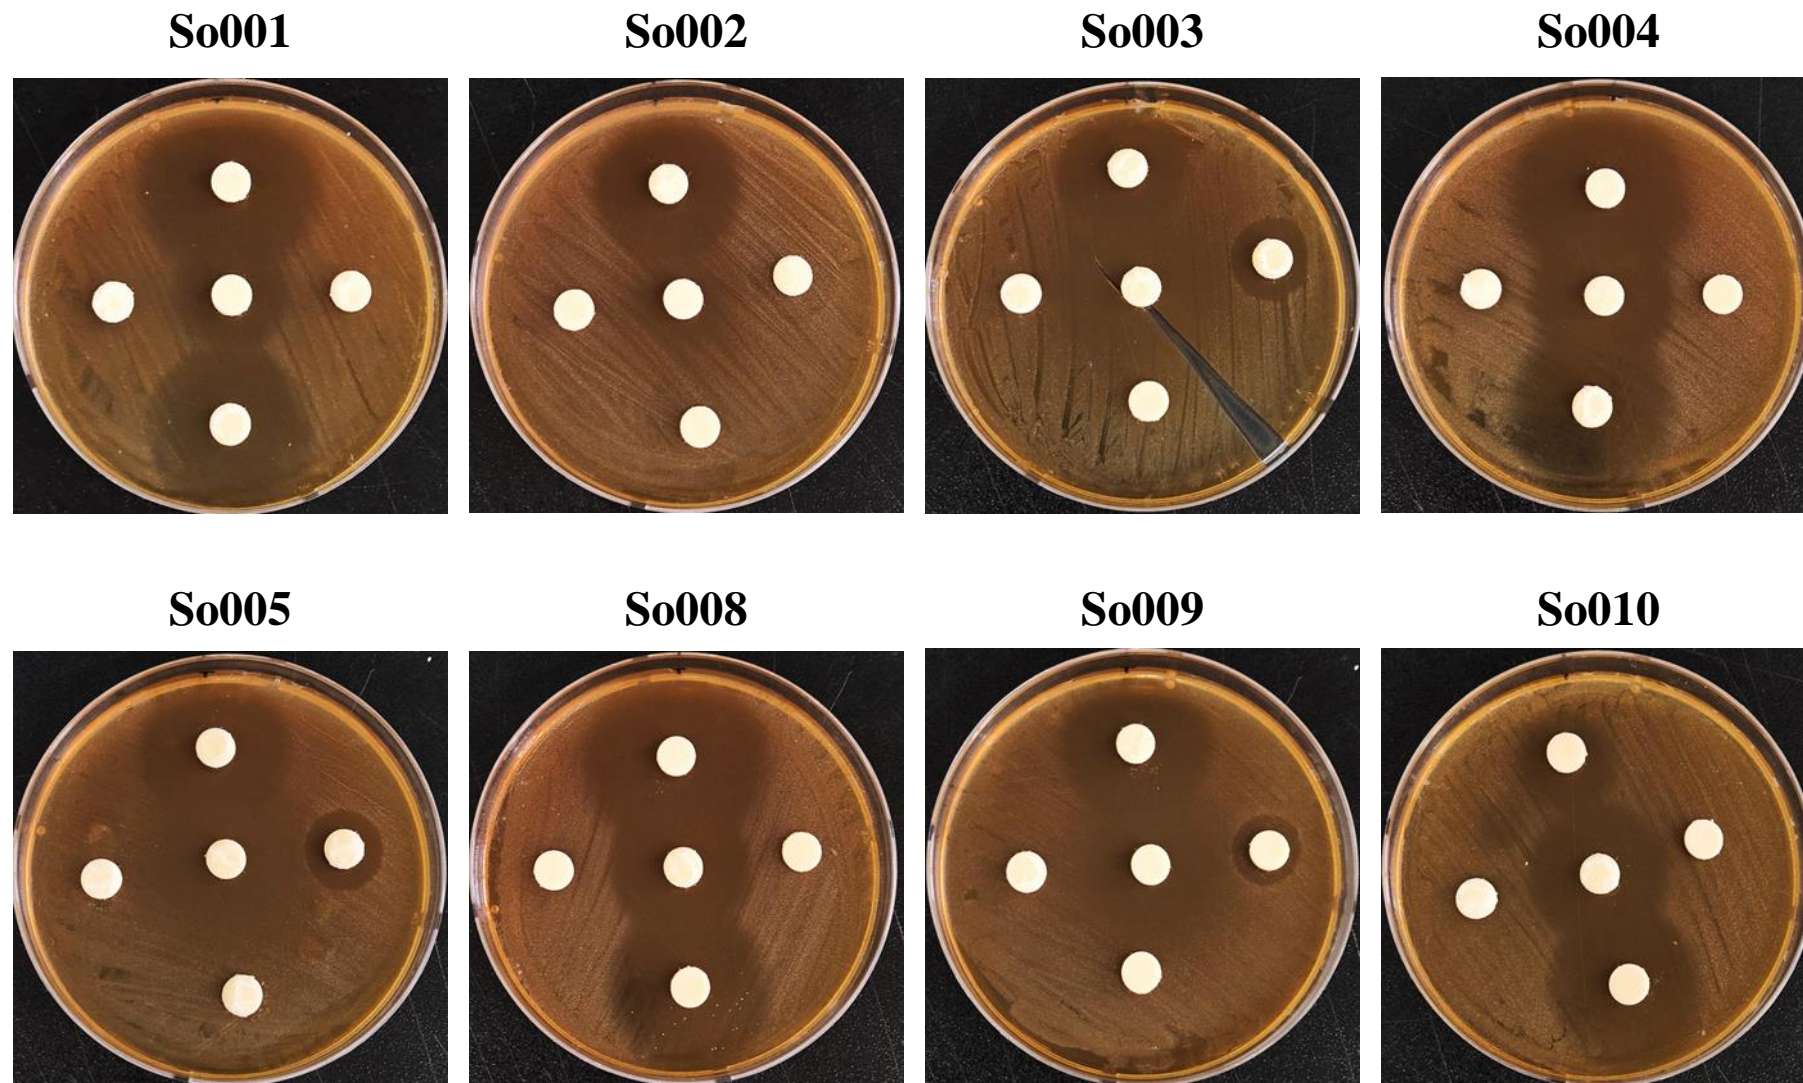

**Figure S4.** Antibiotic susceptibility assay a-TCH (Tetracycline, 30  $\mu\text{g/mL}$ ), b-VAN (Vancomycin, 30  $\mu\text{g/mL}$ ), c-Ery (Erythromycin, 15  $\mu\text{g/mL}$ ), d-GEN (Gentamycin, 10  $\mu\text{g/mL}$ ), e-Amp (Ampicillin, 10  $\mu\text{g/mL}$ ).

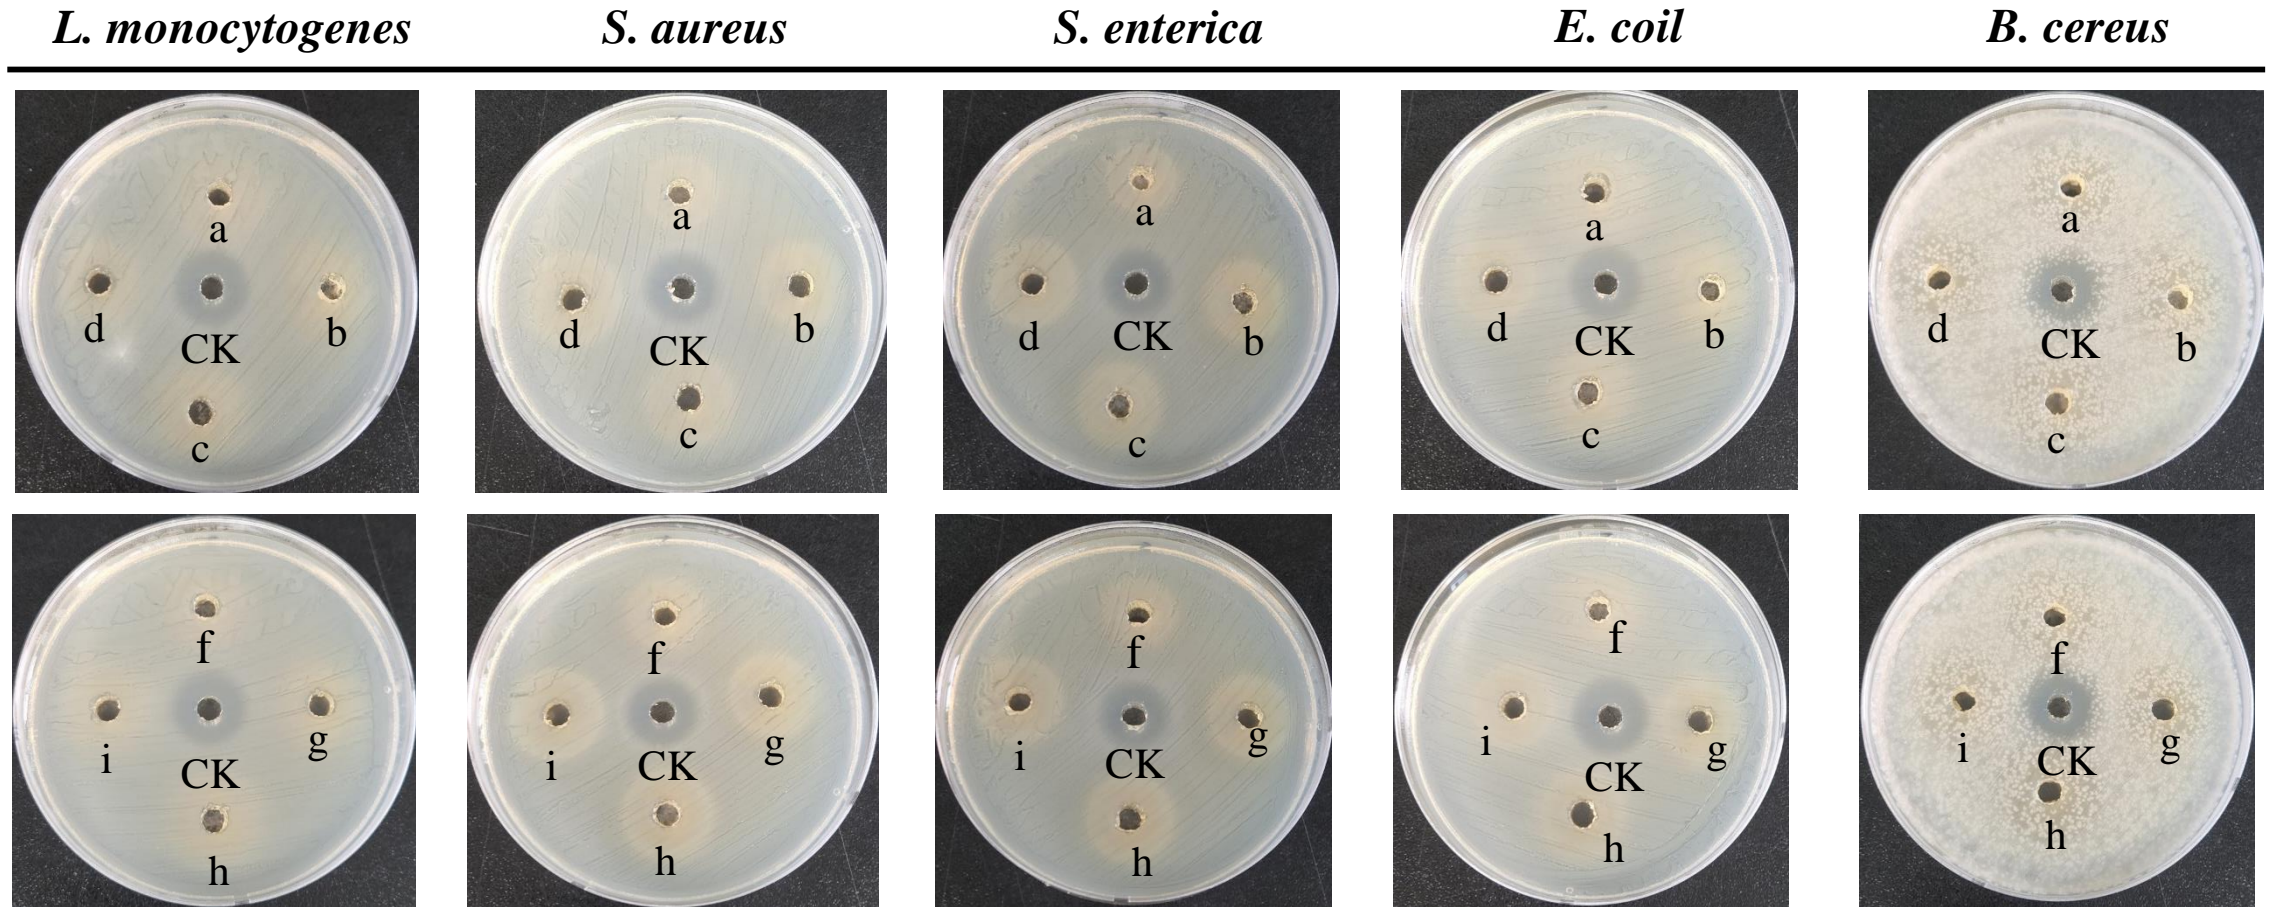

**Figure S5.** Antibacterial activity of cell free supernatant adjusted to pH 6.5. a-So1, b-So2, c-So3, d-So4, f-So5, g-So8, h-So9, i-So10, CK-TCH (50 µg/mL).



**Table S1.** Antibacterial activity of cell free supernatant of *E. faecium strains*. +++ = zone dia > 15 mm, ++ = zone dia >10-15mm, + = zone dia > 5-10 mm, and - =no zone of inhibition.

| Isolates                | Zone of inhibition |      |                |      |                  |      |                  |      |                         |      |
|-------------------------|--------------------|------|----------------|------|------------------|------|------------------|------|-------------------------|------|
|                         | <i>S. entrica</i>  |      | <i>E. coli</i> |      | <i>B. cereus</i> |      | <i>S. aureus</i> |      | <i>L. monocytogenes</i> |      |
|                         | CFS                | nCFS | CFS            | nCFS | CFS              | nCFS | CFS              | nCFS | CFS                     | nCFS |
| <i>E. faecium</i> So001 | ++                 | -    | ++             | +    | ++               | -    | ++               | +    | ++                      | -    |
| <i>E. faecium</i> So002 | +                  | -    | +              | -    | -                | -    | +                | -    | +                       | -    |
| <i>E. faecium</i> So003 | ++                 | -    | +              | +    | -                | -    | ++               | -    | ++                      | -    |
| <i>E. faecium</i> So004 | ++                 | +    | ++             | +    | +                | -    | ++               | +    | +++                     | +    |
| <i>E. faecium</i> So005 | -                  | -    | +              | +    | -                | -    | +                | -    | ++                      | +    |
| <i>E. faecium</i> So008 | +                  | -    | ++             | +    | ++               | -    | ++               | -    | ++                      | +    |
| <i>E. faecium</i> So009 | -                  | -    | -              | -    | +                | -    | +                | -    | +                       | -    |
| <i>E. faecium</i> So010 | +                  | -    | ++             | +    | +                | -    | ++               | -    | +++                     | +    |
